# Supplementary material for: Who Is Serving Us? Food Safety Rules Compliance Among Brazilian Food Truck Vendors
Source: MDPI journal article supplement (doi:10.3390/ijerph15122807), 2018-12-10
Supplement: s1 [file s1]

## FOOD TRUCK VENDOR QUESTIONNAIRE

|                     |              |
|---------------------|--------------|
| <b>Number:</b>      | <b>Year:</b> |
| <b>Food Truck:</b>  |              |
| <b>Owner:</b>       |              |
| <b>Email/Phone:</b> |              |

|                                                                                                                                                                                                                                          |
|------------------------------------------------------------------------------------------------------------------------------------------------------------------------------------------------------------------------------------------|
| <b>1. Gender</b>                                                                                                                                                                                                                         |
| <input type="checkbox"/> Male<br><input type="checkbox"/> Female                                                                                                                                                                         |
| <b>2. Color</b>                                                                                                                                                                                                                          |
| <input type="checkbox"/> White<br><input type="checkbox"/> Black<br><input type="checkbox"/> Yellow<br><input type="checkbox"/> Red                                                                                                      |
| <b>3. Nationality</b>                                                                                                                                                                                                                    |
| <input type="checkbox"/> Brazilian<br><input type="checkbox"/> Other                                                                                                                                                                     |
| <b>4. Age</b>                                                                                                                                                                                                                            |
| <input type="checkbox"/> ≤20<br><input type="checkbox"/> 21-30<br><input type="checkbox"/> 31-40<br><input type="checkbox"/> >40                                                                                                         |
| <b>5. Marital Status</b>                                                                                                                                                                                                                 |
| <input type="checkbox"/> Married<br><input type="checkbox"/> Single<br><input type="checkbox"/> Divorced<br><input type="checkbox"/> Widowed                                                                                             |
| <b>6. Children</b>                                                                                                                                                                                                                       |
| <input type="checkbox"/> 0<br><input type="checkbox"/> 1<br><input type="checkbox"/> 2<br><input type="checkbox"/> 3<br><input type="checkbox"/> 4<br><input type="checkbox"/> ≥5                                                        |
| <b>7. Level of Education</b>                                                                                                                                                                                                             |
| <input type="checkbox"/> Primary (Elementary School)<br><input type="checkbox"/> Secondary (High School)<br><input type="checkbox"/> Tertiary (Graduation)<br><input type="checkbox"/> Quaternary (Post-graduation)                      |
| <b>8. Reason to start a food truck business</b>                                                                                                                                                                                          |
| <input type="checkbox"/> Unemployment<br><input type="checkbox"/> Opportunity of starting my own business<br><input type="checkbox"/> Feeling connected to the food truck business<br><input type="checkbox"/> Food truck is my side job |

|                                                                                                                                                                                                                  |
|------------------------------------------------------------------------------------------------------------------------------------------------------------------------------------------------------------------|
| <input type="checkbox"/> Formal markets are saturated<br><input type="checkbox"/> Other                                                                                                                          |
| <b>9. Number of meals sold (per day)</b>                                                                                                                                                                         |
| <input type="checkbox"/> ≤50<br><input type="checkbox"/> 50-100<br><input type="checkbox"/> 100-150<br><input type="checkbox"/> >150                                                                             |
| <b>10. Monthly income (R\$; minimum wage)</b>                                                                                                                                                                    |
| <input type="checkbox"/> 1-4<br><input type="checkbox"/> 5-9<br><input type="checkbox"/> 10-14<br><input type="checkbox"/> 15-19<br><input type="checkbox"/> 20-24<br><input type="checkbox"/> >24               |
| <b>11. Investment in the food truck (R\$)</b>                                                                                                                                                                    |
| <input type="checkbox"/> Rental<br><input type="checkbox"/> 10k-30k<br><input type="checkbox"/> 30k-50k<br><input type="checkbox"/> 50k-70k<br><input type="checkbox"/> 70k-90k<br><input type="checkbox"/> >90k |
| <b>12. Previous experience in food services</b>                                                                                                                                                                  |
| <input type="checkbox"/> Yes<br><input type="checkbox"/> No<br>If yes, please specify your previous experience in the foodservice business: _____                                                                |
| <b>13. Training in food safety/food hygiene</b>                                                                                                                                                                  |
| <input type="checkbox"/> Yes<br><input type="checkbox"/> No<br>If yes, have you received training in the last 6 months?<br><input type="checkbox"/> Yes<br><input type="checkbox"/> No                           |
| <b>14. Employee(s) in the food truck</b>                                                                                                                                                                         |
| <input type="checkbox"/> 0<br><input type="checkbox"/> 1<br><input type="checkbox"/> 2<br><input type="checkbox"/> 3<br><input type="checkbox"/> 4<br><input type="checkbox"/> >5                                |
| <b>15. Employee(s) in the commissary kitchen</b>                                                                                                                                                                 |
| <input type="checkbox"/> 0<br><input type="checkbox"/> 1<br><input type="checkbox"/> 2<br><input type="checkbox"/> 3<br><input type="checkbox"/> 4<br><input type="checkbox"/> >5                                |

|                                                                                                                                                                     |
|---------------------------------------------------------------------------------------------------------------------------------------------------------------------|
| <b>16. Recruitment and hiring process</b>                                                                                                                           |
| <p>( ) Previous experience in food trucks<br/>( ) Previous experience in the foodservice business<br/>( ) Family member<br/>( ) Employee referral<br/>( ) Other</p> |
| <b>17. Certified person in charge for the food handling practices</b>                                                                                               |
| <p>( ) Yes<br/>( ) No<br/>If yes, please specify: _____</p>                                                                                                         |
| <b>18. Best Practices and Standard Operating Procedures Manual</b>                                                                                                  |
| <p>( ) Yes<br/>( ) No<br/>( ) Under implementation</p>                                                                                                              |
| <b>19. Licensed food truck</b>                                                                                                                                      |
| <p>( ) Yes<br/>( ) No<br/>( ) Under implementation</p>                                                                                                              |
